# Supplementary material for: Polycystin-2 Is Required for Chondrocyte Mechanotransduction and Traffics to the Primary Cilium in Response to Mechanical Stimulation
Source: MDPI journal article supplement (doi:10.3390/ijms22094313), 2021-04-21
Supplement: s1 [file s1]

# Polycystin-2 is required for chondrocyte mechanotransduction and traffics to the primary cilium in response to mechanical stimulation

Clare L Thompson<sup>1\*</sup>, Megan Mc Fie<sup>1</sup>, J Paul Chapple<sup>2</sup>, Hannah M Mitchison<sup>3</sup>, Philip Beales<sup>3</sup>, Martin M Knight<sup>1</sup>

<sup>1</sup>Centre for Predictive *In Vitro* Models, School of Engineering and Materials Science, Queen Mary University of London, London, E1 4NS, UK. <sup>2</sup> Centre for Endocrinology, William Harvey Research Institute, School of Medicine and Dentistry, Queen Mary University of London, London EC1M 6BQ, UK. <sup>3</sup> Genetics and Genomic Medicine, UCL Great Ormond Street Institute of Child Health, London WC1N 1EH, UK

## Supplementary figures

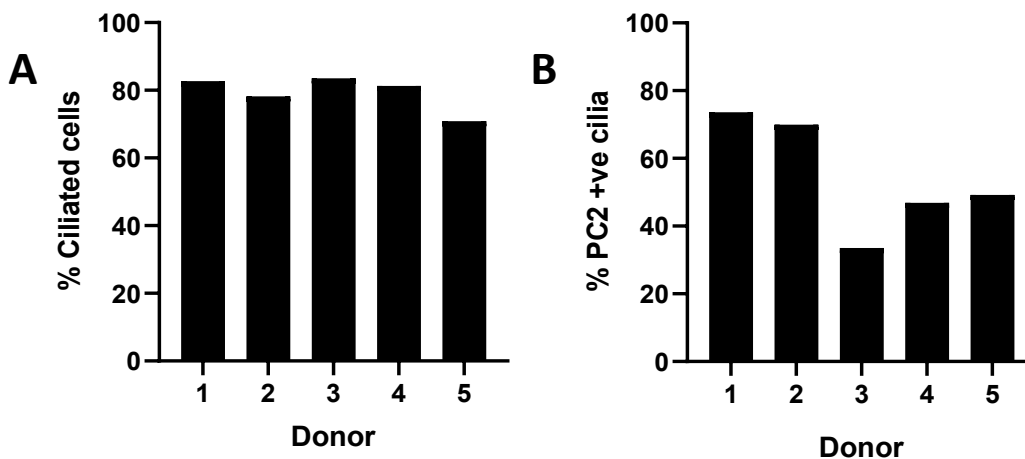

## Figure S1: Donor variability in Polycystin-2 localisation

Freshly isolated bovine articular chondrocytes were cultured on glass coverslips until confluence. Chondrocytes were immuno-labelled for polycystin-2 (PC2), primary cilia were labelled for acetylated tubulin and nuclei were counterstained with DAPI. Both the proportion of (A) ciliated cells and (B) PC2 positive cilia was quantified.

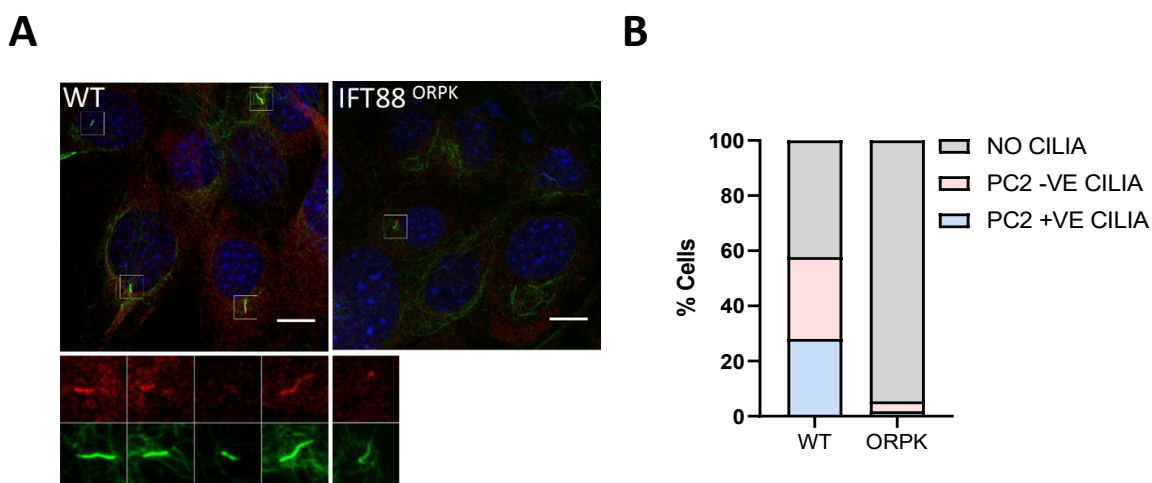

## Figure S2: Polycystin-2 localises to the cilium in WT and ORPK chondrocytes

(A) Immortalised murine chondrocytes (WT and IFT88<sup>ORPK</sup> mutant) were labelled for PC2 (red), acetylated tubulin (green) and nuclei counterstained with DAPI (Blue). Scale bar 5µm. The proportion of ciliated cells and PC2 positive cilia was determined (n>100 cilia).
